# Supplementary material for: Intermittent Compressive Stress Enhanced Insulin-Like Growth Factor-1 Expression in Human Periodontal Ligament Cells
Source: Hindawi journal article supplement (doi:10.1155/2015/369874), 2015-01-01
Supplement: f1 [file 369874.f1.pdf]

## Supplementary Figure Legends

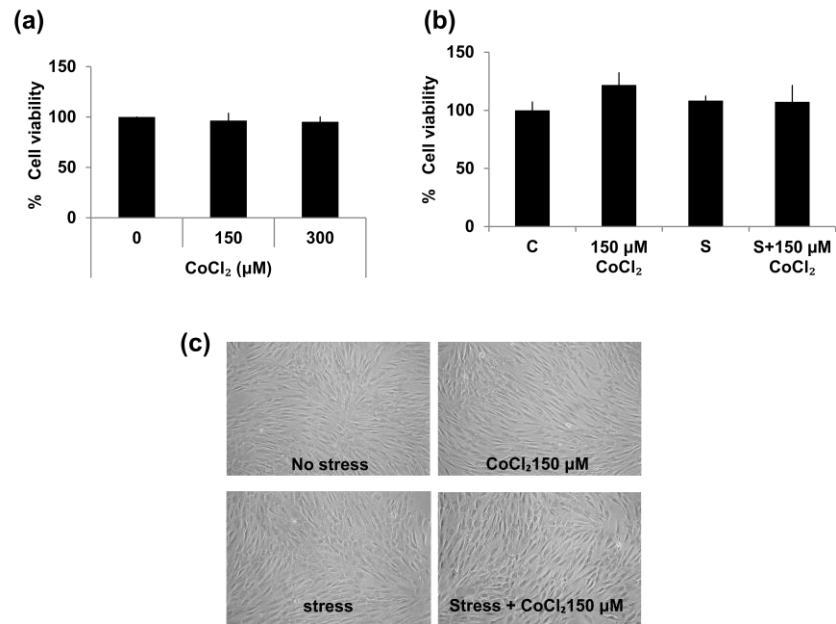

**Supplementary figure 1.** HPDLs viability upon exposure to  $\text{CoCl}_2$  or combined with intermittent mechanical stress was evaluated using MTT assay (a&b) and microscopic examination (c; 100X, original magnification) at 24 h

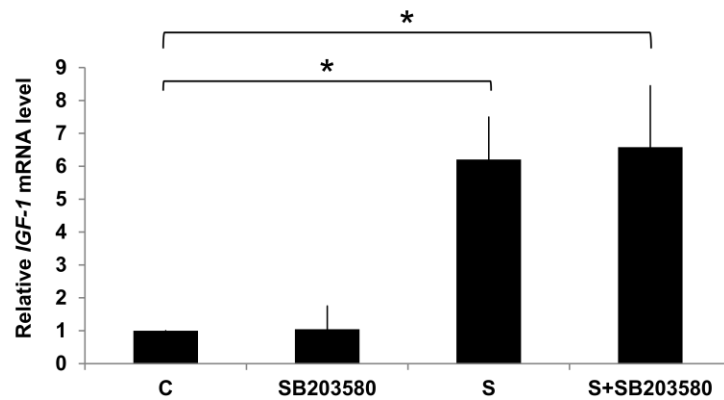

**Supplementary figure 2.** Intermittent mechanical stress induced *IGF-1* expression independent of p38 signaling pathway. SB203580 (3.5  $\mu\text{M}$ ) was used to pre-treat HPDLs 30 min before applying the intermittent mechanical stress for 24 h. The *IGF-1* expression was measured by real-time PCR. Asterisks indicated statistically significant. (C; the control condition, S; the intermittent mechanical stress treatment condition)
